# Supplementary material for: Effects of omega-3, omega-6, and total dietary polyunsaturated fatty acid supplementation in patients with atherosclerotic cardiovascular disease: a systematic review and meta-analysis
Source: Royal Society of Chemistry journal article supplement (doi:10.1039/d3fo02522e), 2023-12-18
Supplement: d3fo02522e1.pdf [file d3fo02522e1.pdf]

**Effects of omega-3, omega-6, and total dietary polyunsaturated fatty acids supplementation in patients with atherosclerotic cardiovascular disease: a systematic review and meta-analysis**

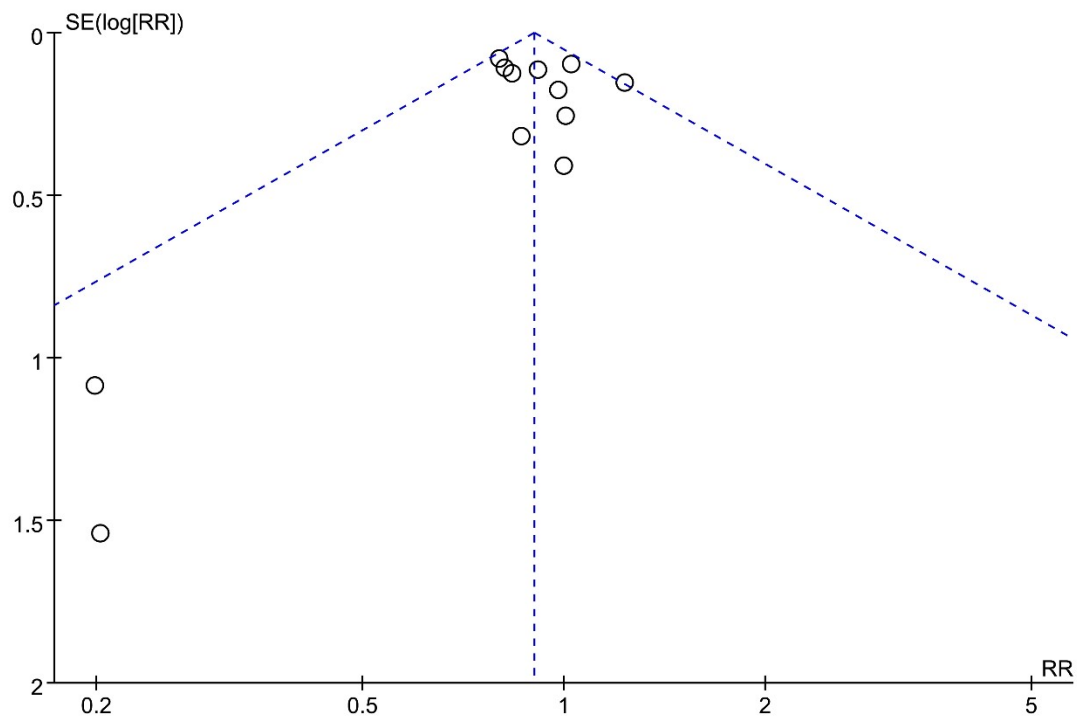

Supplemental Figure 1. Funnel plot of the effect of omega-3 supplementation on all-cause mortality.

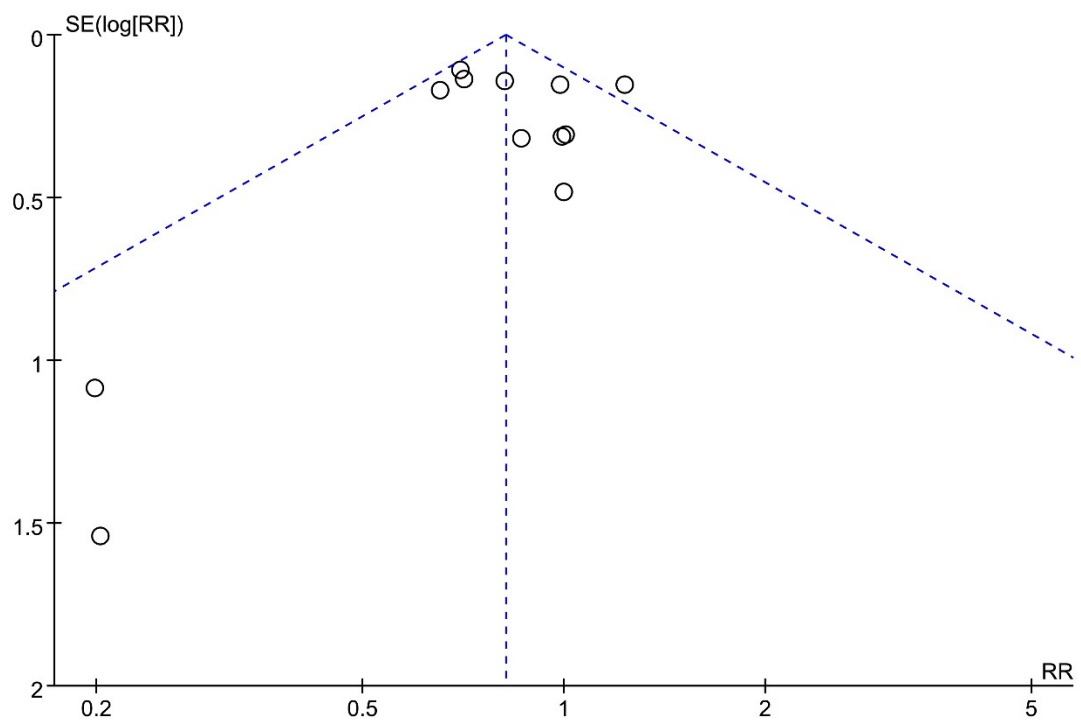

Supplemental Figure 2. Funnel plot of the effect of omega-3 supplementation on CVD mortality.

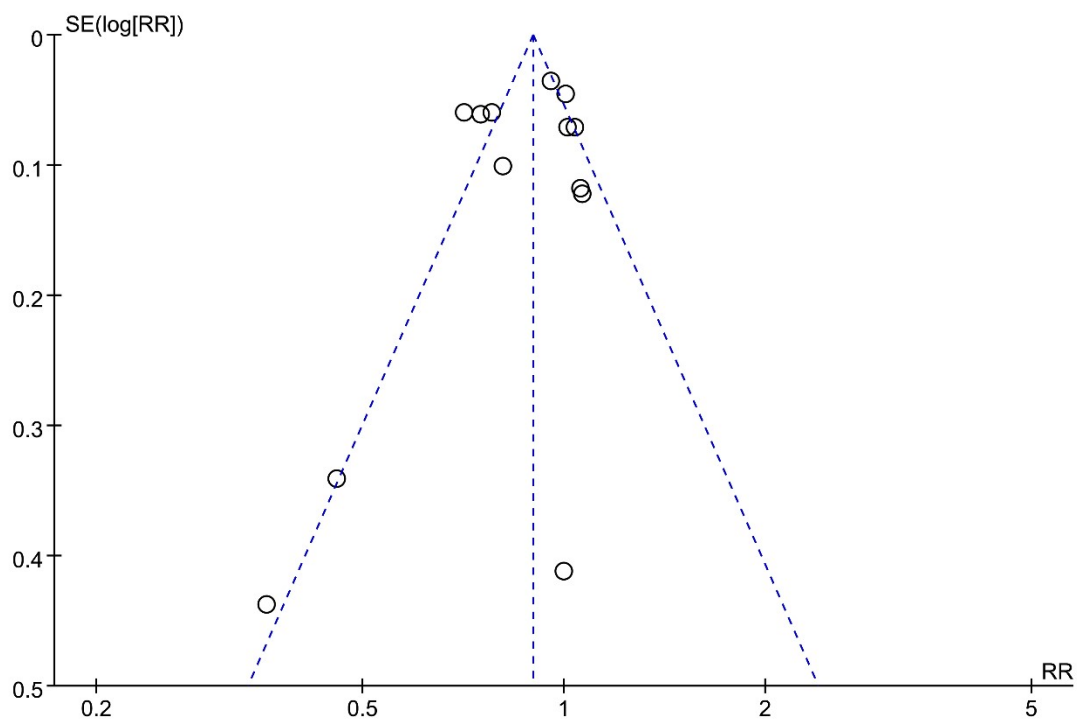

Supplemental Figure 3. Funnel plot of the effect of omega-3 supplementation on CVD event.

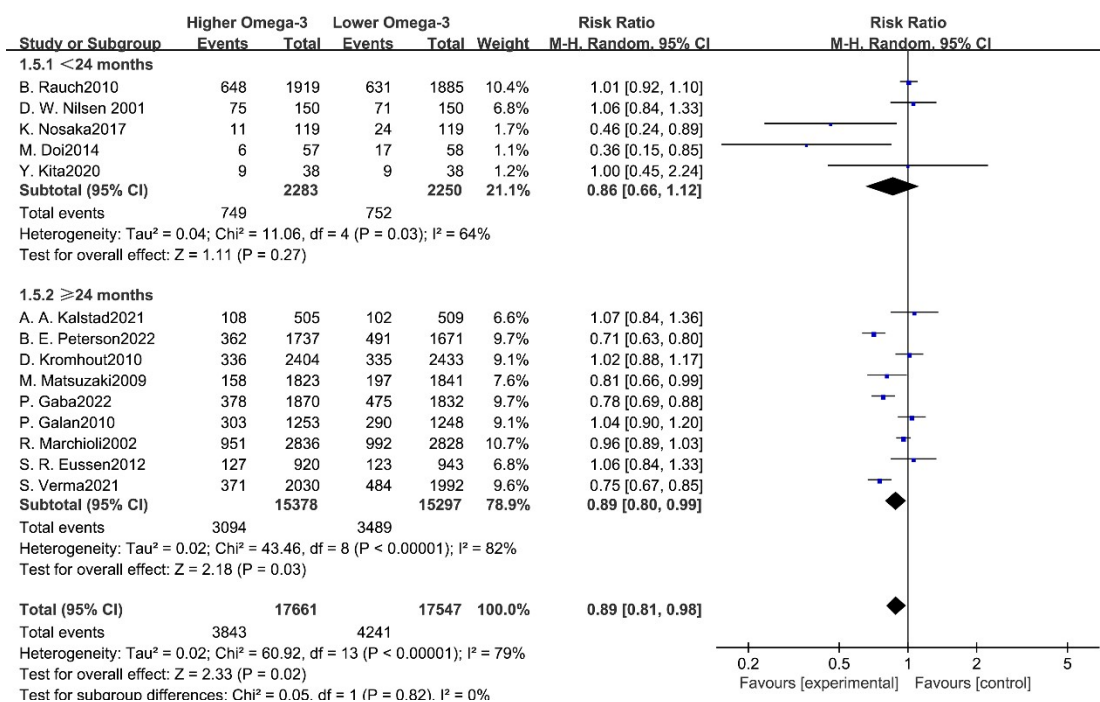

Supplemental Figure 4. Forest plots of the effects of omega-3 supplementation on CVD event with different follow-up duration.

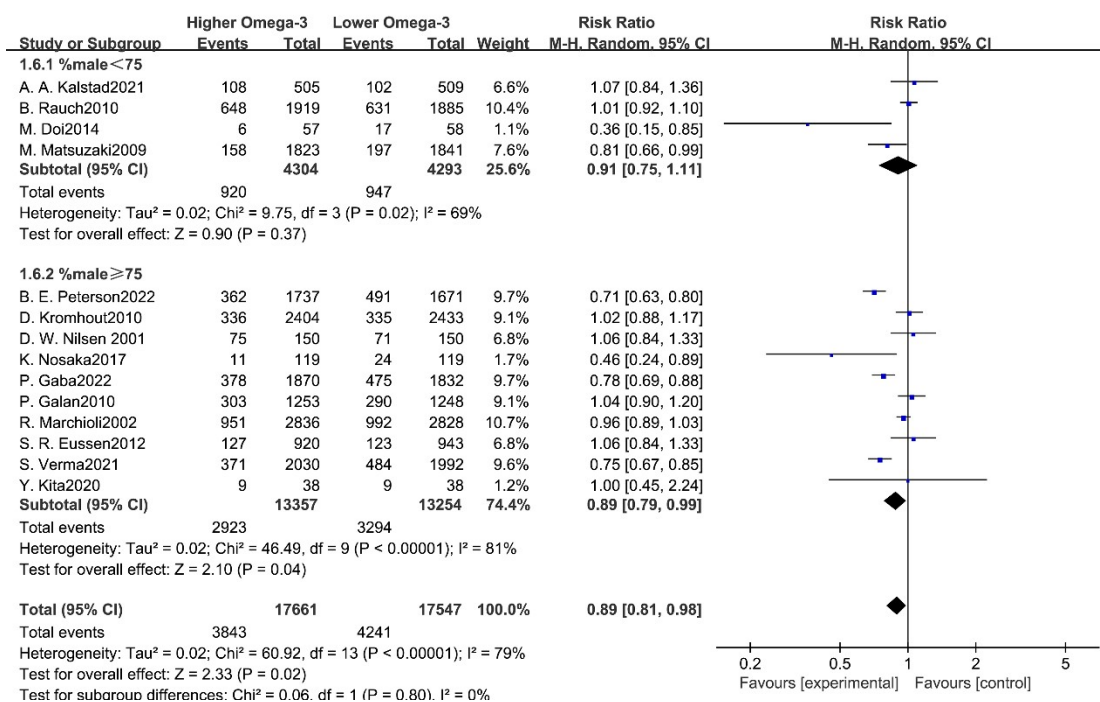

Supplemental Figure 5. Forest plots of the effects of omega-3 supplementation on CVD event with different gender.

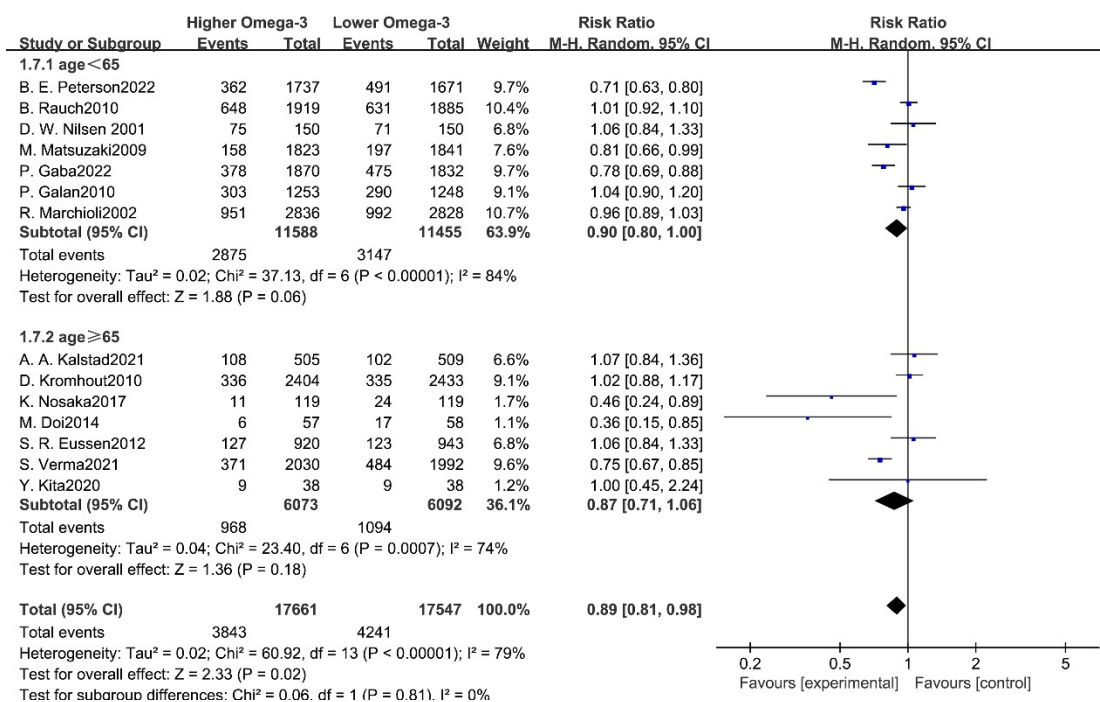

Supplemental Figure 6. Forest plots of the effects of omega-3 supplementation on CVD event with different age.

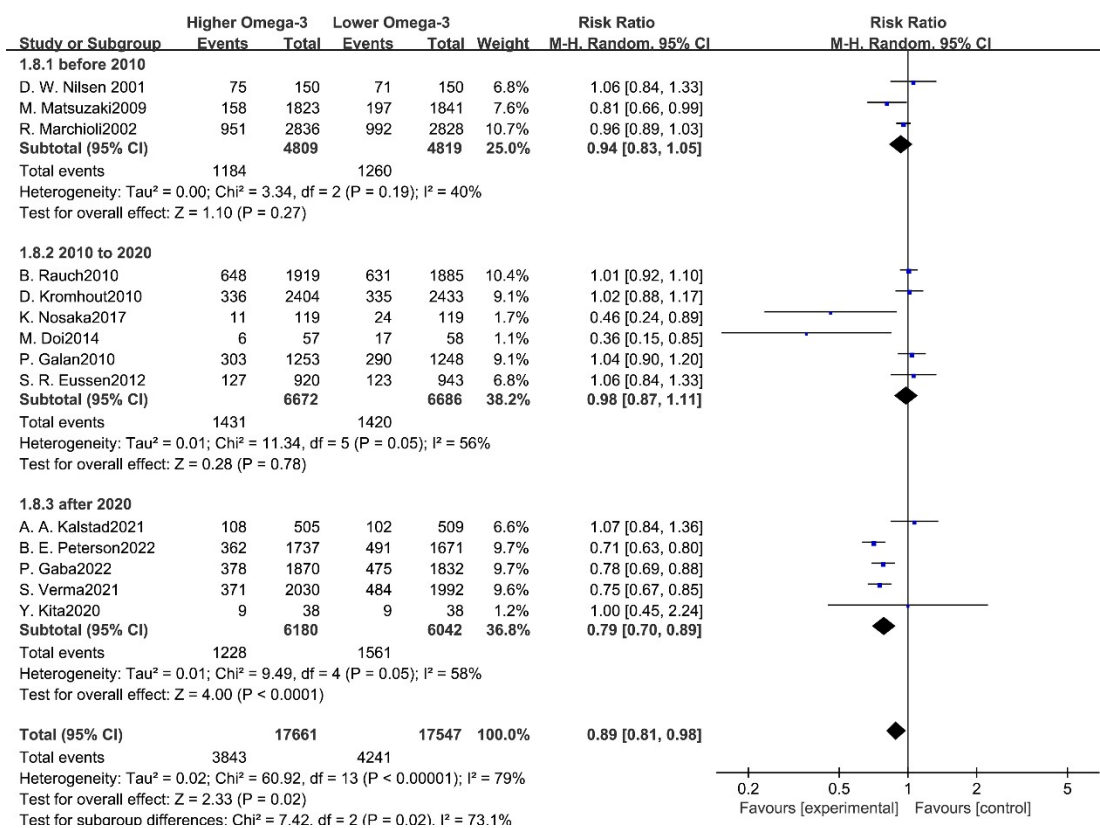

Supplemental Figure 7. Forest plots of the effects of omega-3 supplementation on CVD event with different time of publication.



|                                             |                   |        |               |   |        |
|---------------------------------------------|-------------------|--------|---------------|---|--------|
| Two-stage fixed-effects dose-response model | Number of studies | =      | 6             |   |        |
| Generalized least-squares regression        | Number of obs     | =      | 6             |   |        |
| Goodness-of-fit chi2(5)                     | =                 | 3.18   | Model chi2(1) | = | 4.66   |
| Prob > chi2                                 | =                 | 0.6726 | Prob > chi2   | = | 0.0308 |

  

| logrr | Coefficient | Std. err. | z     | P> z  | [95% conf. interval] |           |
|-------|-------------|-----------|-------|-------|----------------------|-----------|
| dose  | -.035925    | .0166388  | -2.16 | 0.031 | -.0685364            | -.0033136 |

Supplemental Figure 8. Two-stage fixed-effects dose-response model of omega-3 intake and all-cause mortality.

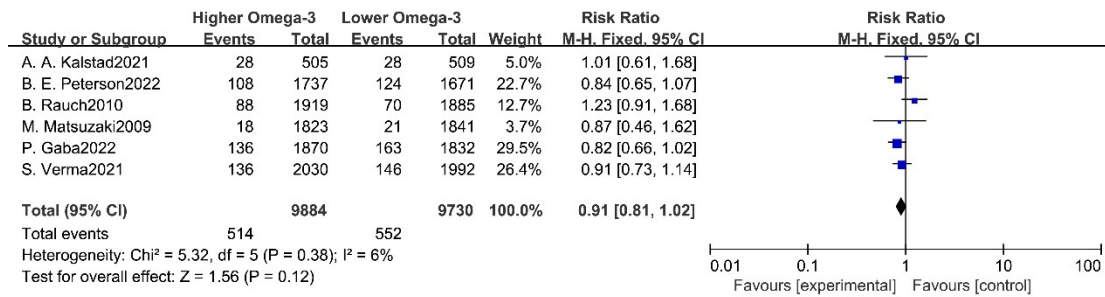

Supplemental Figure 9. Forest plot of the effects of different doses of omega-3 supplementation on all-cause mortality with different time of publication.

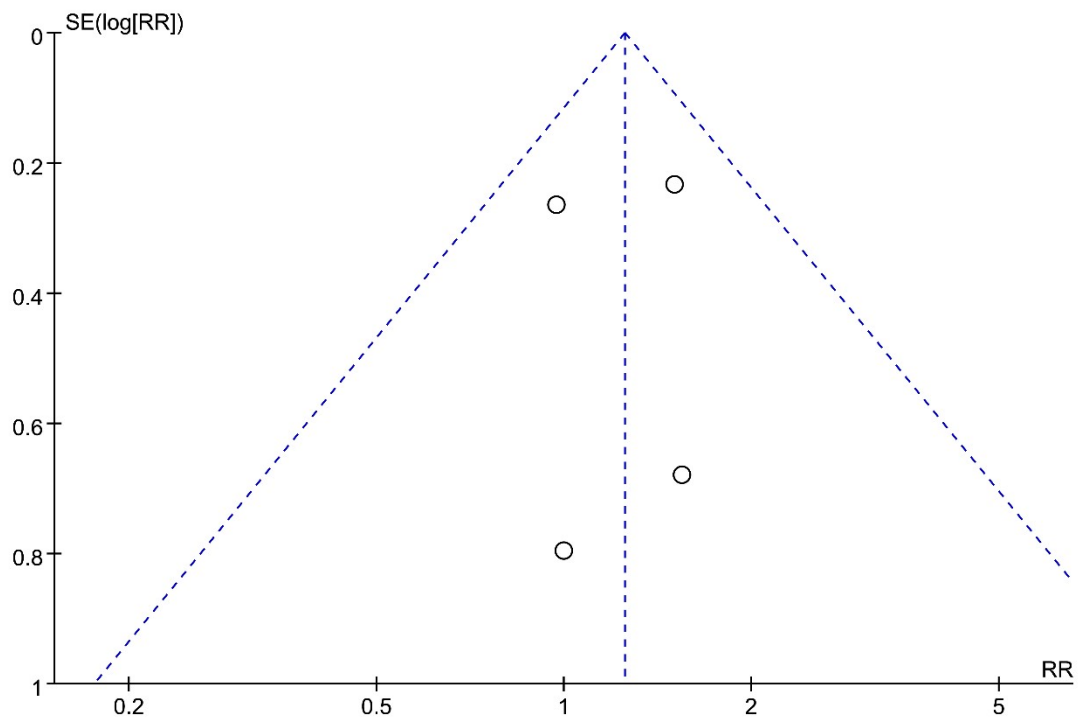

Supplemental Figure 10. Funnel plot of the effect of omega-6 supplementation on all-cause mortality.

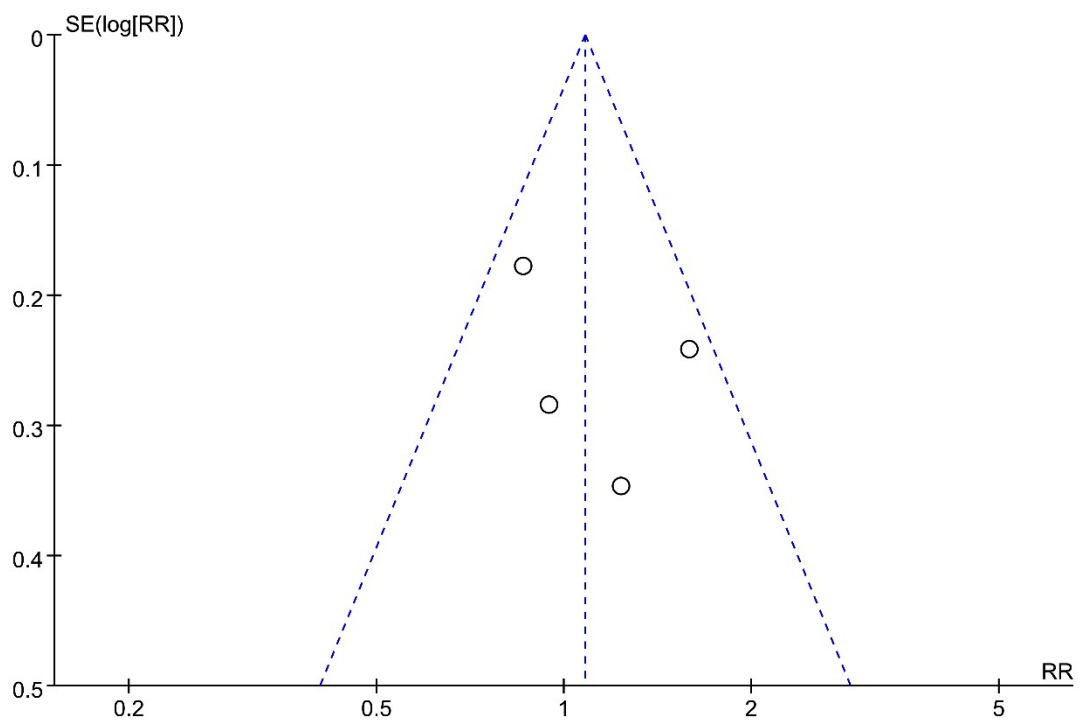

Supplemental Figure 11. Funnel plot of the effect of omega-6 supplementation on CVD event.
